# Supplementary material for: MassARRAY multigene screening combined with LDL-C and sdLDL-C detection for more favorable outcomes in type 2 diabetes mellitus therapy
Source: Research Square preprint supplement (doi:10.21203/rs.3.rs-44331/v3), 2021-03-02
Supplement: Supplementary file 1 [file f027b9f5c8b751ca77db538e.xlsx]

## Sheet: 2021.02.04 Additional file 2_Ge
Supplementary Materials 2: MassARRAY multigene screening combined with LDL-C and sdLDL-C detection for more favorable outcomes in type 2 diabetes mellitus therapy Yong Tian1, Junhong Wang1, Yanxiao Liu1, Xiangguang Luo2, Ziying Yao2, Xinjun Wang2,4, Yuanyuan Zhang5, Cheng Xu2* and Xiaoyu Zhao2,3* 1 Department of endocrinology and metabolism, Pingdingshan People’s Hospital No.1, Pingdingshan, Chin…
Patients	ABCB1 (M1)	APOE(M1) (M2)	CETP(M1)	CYP2C9(M1)	HMGCR(M1)	HMGCR(M2)	HTR3B(M1)	HTR7(M1)	KIF6(M1)	SLCO1B1(M1)
BT1809040280LMSBE	CC	M2-TT/M1-CC	GA	AA	TT	AA	GG	CC	AG	TT
BT1809040282LMSBE	CC	M2-TT/M1-CC	AA	AA	TT	AA	GA	CT	AA	TT
BT1809060268LMSBE	CC	M2-TT/M1-CC	GG	AA	TT	AA	AA	CT	AG	TT
BT1809130302LMSBE	TC	M2-TC/M1-CC	AA	AC	TT	AA	AA	CT	AA	TT
BT1809220315LMSBE	TC	M2-TT/M1-CT	GG	AA	TT	AA	AA	CC	AA	TT
BT1810030072LMSBE	TC	M2-TT/M1-CC	GA	AA	TT	AA	GG	CT	AA	TC
BT1810040288LMSBE	TC	M2-TT/M1-TC	GG	AC	TT	AA	GA	CT	AG	TT
BT1810060042LMSBE	TC	M2-TT/M1-CC	GG	AA	TT	AA	AA	TT	AG	TT
BT1810080232LMSBE	TC	M2-TT/M1-CC	AA	AA	TT	AA	AA	CT	AA	TT
BT1810110176LMSBE	TT	M2-TT/M1-CC	GG	AA	TT	AA	GA	CC	AA	TT
BT1810150269LMSBE	TC	M2-TT/M1-CC	GG	AA	TT	AA	GA	CC	GG	TT
BT1810150270LMSBE	TC	M2-TT/M1-CC	GG	AA	TT	AA	AA	CT	AG	TC
BT1810160304LMSBE	TT	M2-CT/M1-CC	GG	AA	TT	AA	AA	CT	GG	TT
BT1810180221LMSBE	CC	M2-TT/M1-CC	GA	AA	TT	AA	AA	CT	AA	TT
BT1810180224LMSBE	CC	M2-TT/M1-CC	GA	AA	TT	AA	AA	CT	AG	TT
BT1810240256LMSBE	TC	M2-TT/M1-CC	GA	AA	TT	AA	GG	CC	AG	TC
BT1810260163LMSBE	TT	M2-TT/M1-CC	GA	AC	TT	AA	AA	CC	AA	TT
BT1810260164LMSBE	CC	M2-TT/M1-CC	GA	AA	TT	AA	AA	CC	AA	TC
BT1810280289LMSBE	TT	M2-TC/M1-CC	GG	AA	TT	AA	AA	CC	AA	TT
BT1810280290LMSBE	TC	M2-TT/M1-TC	GA	AA	TT	AA	AA	CC	AG	TT
BT1810280292LMSBE	CC	M2-TT/M1-CC	GA	AA	TT	AA	GA	CC	AG	TC
BT1810300261LMSBE	TC	M2-TT/M1-CC	GA	AA	TT	AA	AA	CC	GG	TT
BT1810300263LMSBE	TC	M2-TT/M1-CC	GA	AA	TT	AA	AA	TT	GG	CC
BT1811010167LMSBE	TC	M2-TT/M1-CC	GG	AA	TT	AA	GA	CT	GG	TT
BT1811160309LMSBE	TT	M2-TC/M1-CC	GA	AA	TT	AA	AA	TT	AG	TT
BT1811170499LMSBE	TT	M2-TT/M1-CC	AA	AA	TT	AA	GA	CT	AG	TT
BT1811170502LMSBE	CC	M2-TT/M1-CC	GG	AA	TT	AA	AA	CC	AG	TT
BT1811220095LMSBE	CC	M2-TT/M1-CC	GA	AA	TT	AA	AA	CT	AA	TT
BT1811220097LMSBE	TT	M2-TC/M1-CC	GG	AA	TT	AA	AA	CC	AA	TC
BT1811280163LMSBE	TC	M2-TT/M1-CC	AA	AA	TT	AA	GA	CC	GG	CC
BT1811290493LMSBE	TC	M2-TT/M1-CC	GA	AA	TT	AA	AA	CT	AG	TT
BT1811290497LMSBE	TC	M2-TT/M1-CC	GG	AA	TT	AA	GA	CT	AG	TC
BT1812010453LMSBE	CC	M2-TT/M1-CC	GG	AA	TT	AA	AA	CC	AA	TT
BT1812090328LMSBE	CC	M2-TT/M1-CC	GA	AA	TT	AA	AA	CT	AA	TT
BT1812260231LMSBE	CC	M2-TC/M1-CC	AA	AA	TT	AA	AA	CT	AG	TT
BT1901020069LMSBE	TC	M2-TC/M1-CC	GA	AA	TT	AA	AA	CC	AA	TT
BT1901120220LMSBE	TC	M2-TC/M1-CC	GG	AA	TT	AT	GA	CC	AA	CC
BT1901240219LMSBE	TC	M2-CC/M1-CC	AA	AA	TT	AA	AA	CT	AA	TT
BT1901280205LMSBE	CC	M2-TT/M1-CC	GG	AA	TT	AA	GA	CC	AA	TC
BT1901280206LMSBE	CC	M2-TT/M1-CC	AA	AA	TT	AA	AA	CC	GG	TT
BT1901300164LMSBE	TT	M2-TT/M1-CC	AA	AA	TT	AA	GA	TT	AG	TT
BT1902140241LMSBE	TC	M2-TT/M1-TC	AA	AA	TT	AA	AA	CC	AA	TT
BT1902160173LMSBE	TT	M2-TT/M1-CC	GA	AA	TT	AA	GA	CC	AG	CC
BT1902220205LMSBE	TC	M2-TT/M1-CC	GG	AC	TT	AA	AA	CC	AG	TC
BT1903030252LMSBE	TC	M2-TC/M1-CC	GA	AA	TT	AA	AA	CC	GG	TT
BT1903050106LMSBE	TT	M2-TT/M1-CC	GG	AA	TT	AA	GA	CC	AG	TT
BT1903080136LMSBE	TC	M2-TT/M1-CC	GA	AA	TT	AA	AA	CT	AA	CC
BT1903300350LMSBE	CT	M2-TT/M1-CC	AA	AA	TT	AA	AA	TC	GA	TT
BT1903310159LMSBE	CT	M2-CT/M1-CC	GA	AA	TT	AA	AG	TC	GA	TC
BT1904010312LMSBE	CT	M2-TT/M1-CC	GG	AA	TT	AA	AA	CC	GA	TT
BT1904010314LMSBE	CT	M2-TT/M1-CC	GA	CA	TT	AA	AA	CC	GA	TT
BT1904010320LMSBE	CT	M2-TT/M1-CC	AA	AA	TT	AA	AA	CC	GA	TT
BT1904220068LMSBE	TT	M2-TT/M1-CC	GG	AA	TT	AA	AG	CC	GA	TT
BT1904220069LMSBE	CC	M2-TT/M1-CC	GA	AA	TT	AA	AA	CC	GA	TT
BT1904260370LMSBE	CC	M2-TT/M1-CC	GG	AA	TT	AA	AA	CC	AA	TT
BT1904270227LMSBE	TT	M2-CT/M1-CC	GG	CA	TT	AA	AA	CC	GA	TT
BT1904280357LMSBE	CT	M2-CT/M1-CC	GA	AA	TT	AA	AA	TC	GG	TT
BT1904290277LMSBE	CT	M2-TT/M1-CC	GA	AA	TT	TA	AA	CC	GA	TT
BT1904290280LMSBE	CC	M2-TT/M1-CC	GG	AA	TT	AA	AA	CC	GA	TT
BT1904300263LMSBE	CC	M2-TT/M1-CT	GA	AA	TT	AA	AG	CC	GA	TT
BT1905050070LMSBE	CC	M2-TT/M1-CC	GA	AA	TT	AA	AA	TC	GA	TT
BT1905060039LMSBE	CT	M2-TT/M1-CT	GG	AA	TT	AA	AG	CC	GA	TT
BT1905060041LMSBE	CT	M2-TT/M1-CT	GG	AA	TT	AA	AA	CC	GA	TT
BT1905080121LMSBE	CC	M2-TT/M1-CT	GA	AA	TT	AA	AA	TC	GG	TT
BT1905110570LMSBE	CT	M2-TT/M1-CC	GG	AA	TT	AA	AA	CC	GG	TC
BT1905120100LMSBE	TT	M2-TT/M1-CC	GA	AA	TT	AA	AA	TC	GG	TC
BT1905130255LMSBE	CT	M2-TT/M1-CC	GG	AA	TT	AA	AG	TC	GA	TT
BT1905130259LMSBE	CT	M2-TT/M1-CC	GA	AA	TT	AA	AA	CC	AA	CC
BT1905220236LMSBE	CT	M2-TT/M1-CT	AA	CA	TT	AA	AG	CC	GA	TC
BT1905230460LMSBE	CT	M2-TT/M1-CC	GG	AA	TT	AA	AG	TC	GG	TC
BT1905300494LMSBE	CT	M2-CT/M1-CT	AA	CA	TT	AA	AA	CC	AA	CC
BT1905300495LMSBE	CT	M2-TT/M1-CC	GA	AA	TT	AA	AA	TC	GG	TT
BT1905310066LMSBE	CT	M2-TT/M1-CT	GA	AA	TT	TA	AA	TC	GG	TT
BT1906010197LMSBE	CT	M2-TT/M1-CC	GA	AA	TT	AA	AA	TC	AA	TT
BT1906010199LMSBE	CT	M2-TT/M1-CC	GA	AA	TT	AA	AG	CC	GG	TT
BT1906030431LMSBE	CC	M2-TT/M1-CC	GG	AA	TT	AA	AA	CC	GA	TT
BT1906060338LMSBE	CT	M2-TT/M1-CC	GA	AA	TT	AA	AA	CC	GA	TT
BT1907060336LMSBE	TC	M2-CC/M1-CC	GA	AA	TG	AA	GG	CC	AA	TT
